# Supplementary material
Source: MDPI journal article supplement (https://www.mdpi.com/2071-1050/15/9/7542)

## SUPPLEMENTARY MATERIAL

**Table S1** – Mean values of the chosen answers from Eurobarometer at EU macro-regions level.

Tukey test has been performed on each question considering the macro-regions as a factor.

Different letters (i.e., "a", "b" and "c") depict significant differences between groups, while the same letters (i.e., "a" and "a") show no significant differences between groups

| Eurobarometer question                                         | NORTH  |            | EAST   |            | SOUTH  |            | WEST   |            |
|----------------------------------------------------------------|--------|------------|--------|------------|--------|------------|--------|------------|
|                                                                | Mean   | Tukey-test | Mean   | Tukey-test | Mean   | Tukey-test | Mean   | Tukey-test |
| Perceived seriousness of climate change                        | 7.1    | c          | 7.6    | b          | 8.1    | a          | 7.5    | b          |
| Feeling of personal responsibility for tackling climate change | 35.2 % | a          | 17.2 % | b          | 24.7 % | b          | 38.2 % | a          |

**Figure S1** – Drought stress trends at the EU level with macro-regional level. Significant ( $0.05 > p \geq 0.01$ ), highly significant ( $p < 0.01$ ).

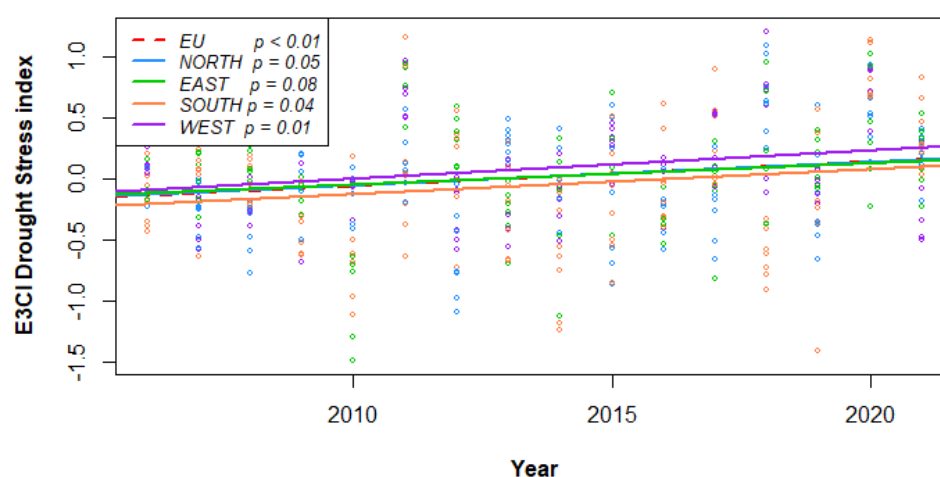

**Figure S2 – Heat stress trends at the EU level with macro-regional level. Significant ( $0.05 > p \geq 0.01$ ), highly significant ( $p < 0.01$ ).**

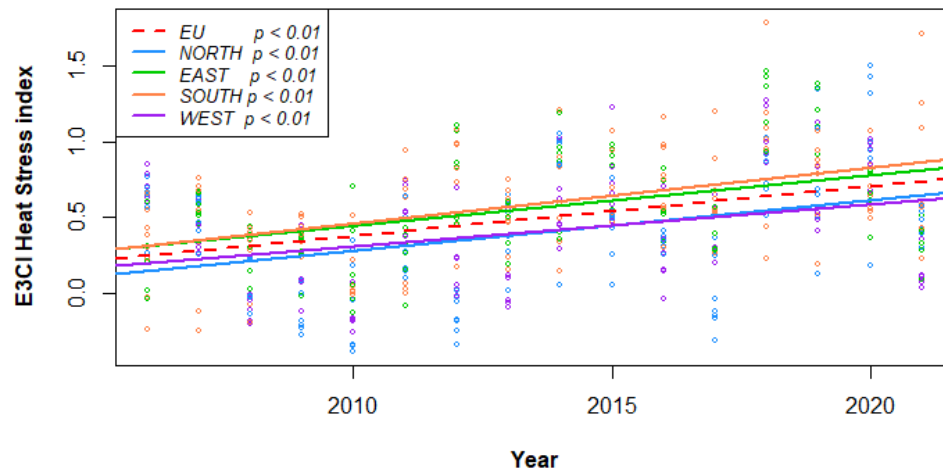

**Figure S3 – There is not significant relationship between the perceived seriousness of climate change and climate policy at an EU level. Significant ( $0.05 > p \geq 0.01$ ), highly significant ( $p < 0.01$ ).**

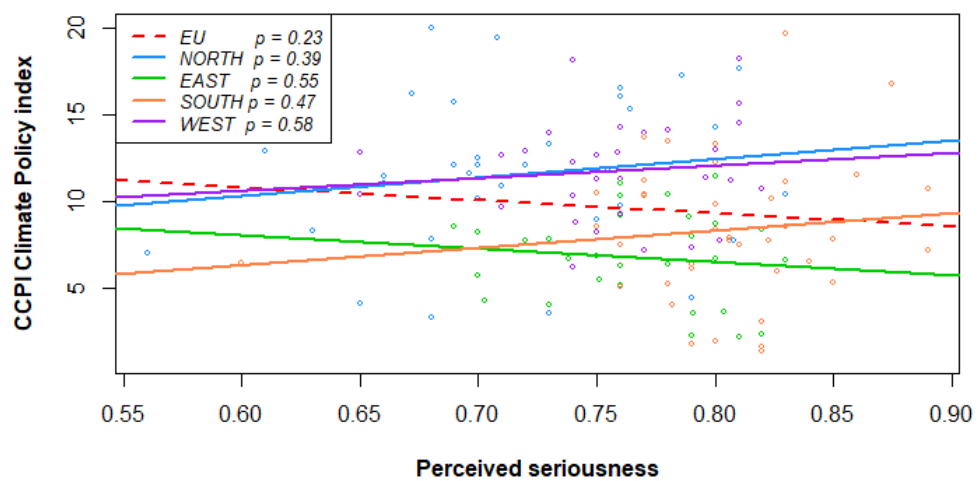

Supplement: s1 [file s1]
